# Supplementary material for: High-porosity Pt–CeO2 nanosponges as oxidation catalyst
Source: Royal Society of Chemistry journal article supplement (doi:10.1039/d4na00525b), 2024-12-30
Supplement: d4na00525b1.pdf [file d4na00525b1.pdf]

## High-Porosity Pt-CeO<sub>2</sub> Nanosponges as Oxidation Catalyst

*Simon Falkner*<sup>[1]</sup>, *Carina B. Maliakkal*<sup>[2]</sup>, *Mareike Liebertseder*<sup>[1]</sup>, *Joachim Czechowsky*<sup>[3]</sup>,  
*Maria Casapu*<sup>[3]</sup>, *Jan-Dierk Grunwaldt*<sup>[3,4]</sup>, *Christian Kübel*<sup>[2]\*</sup>, and *Claus Feldmann*<sup>[1]\*</sup>

- [1] MSc. S. . Falkner, Dr. M. Liebertseder, Prof. Dr. C. Feldmann  
Institute of Inorganic Chemistry (IAC), Karlsruhe Institute of Technology (KIT)  
Engesserstraße 15, D-76131 Karlsruhe (Germany)  
E-mail: claus.feldmann@kit.edu
- [2] Dr. C. B. Maliakkal, Prof. Dr. C. Kübel  
Institute of Nanotechnology (INT) and Karlsruhe Nano Micro Facility (KNMFi),  
Karlsruhe Institute of Technology (KIT), Hermann-von-Helmholtz-Platz 1, 76344  
Eggenstein-Leopoldshafen (Germany)
- [3] MSc. Joachim Czechowsky, Dr. M. Casapu, Prof. Dr. J.-D. Grunwaldt  
Institute for Chemical Technology and Polymer Chemistry (ITCP), Karlsruhe Institute  
of Technology (KIT), Engesserstraße 20, 76131 Karlsruhe (Germany)
- [4] Prof. Dr. J.-D. Grunwaldt  
Institute of Catalysis Research and Technology (IKFT), Karlsruher Institute of  
Technology (KIT), Hermann-von-Helmholtz-Platz 1, 76344 Eggenstein-Leopoldshafen  
(Germany)

## – Supporting Information –

**Content:** 1. Analytical Techniques  
2. Material Characterization

## 1. Analytical Techniques

*Transmission electron microscopy (TEM).* TEM was conducted on a FEI Osiris microscope operated at 200 kV in STEM mode, a probe corrected Thermo Fischer Scientific (TFS) Themis 300 operated in STEM mode at 300 kV, and a double corrected TFS Themis Z operated in STEM or TEM mode at 300 kV. The Osiris microscope was equipped with a Bruker Quantax system (XFlash detector) and the Themis Z/300 with a Super-X EDX detector. EDX spectra were quantified with the TFS software package “TEM imaging and analysis” (TIA) and Velox (version 3.9). TEM samples were prepared by putting a drop of suspension of the respective powder sample in ethanol onto a copper grid coated with amorphous carbon (Lacey-) supporting film or by dry shaking the TEM grid in the powder catalyst. Average particle diameters were calculated by statistical evaluation of at least 150 nanoparticles (ImageJ 1.47v software). Electron tomography was utilised to determine the 3-dimensional structure of the ceria nanosponges. Series of STEM images for tomography were acquired with a tilt interval of 2° using the TFS STEM tomography software. The tilt angle range was from -74° to +76° for the nanosponge shown in the *main paper: Figure 4d*, and -66° to +70° for the nanosponge shown in the *main paper: Figure 4f*. Alignment of the tilt-series was done using ETomo/Imod 4.7 software with residual error below 0.4 pixel. The reconstruction of the 3D volume was done using the SIRT algorithm implemented in Inspect3D V4.4 software. 3D visualization was done in the Avizo software 2021.1.

*X-ray powder diffraction (XRD).* X-ray powder diffraction (XRD) was performed with a Stoe STADI-MP diffractometer operating with Ge-monochromatized Cu-K $\alpha$ -radiation ( $\lambda = 1.54178 \text{ \AA}$ ) and Debye-Scherrer geometry. The dried samples were fixed between Scotch tape and acetate paper and measured between -69° and +69° of two-theta.

*Volumetric sorption analysis* was carried out with an AUTOSORB IQ-XR VITON (Anton Paar), applying N<sub>2</sub> as adsorbate. The specific surface area was determined using the Brunauer-Emmett-Teller (BET) theory. The pore analysis was performed using DFT-based calculations.

## 2. Material Characterization

Sorption data with adsorption isotherms and desorption isotherms, using nitrogen as the sorbent, as well as pore volume and pore diameter as obtained via DFT-based calculations<sup>S1</sup> are shown for  $\text{Ce}_2(\text{C}_2\text{O}_4)_3 \cdot 10 \text{H}_2\text{O}$  precursor particles (Figure S1),  $\text{CeO}_2$  nanosponges (Figure S2), and Pt- $\text{CeO}_2$  nanosponges (Figure S3). The  $\text{CeO}_2$  nanosponges and the Pt-decorated  $\text{CeO}_2$  nanosponges are more-or-less identical.

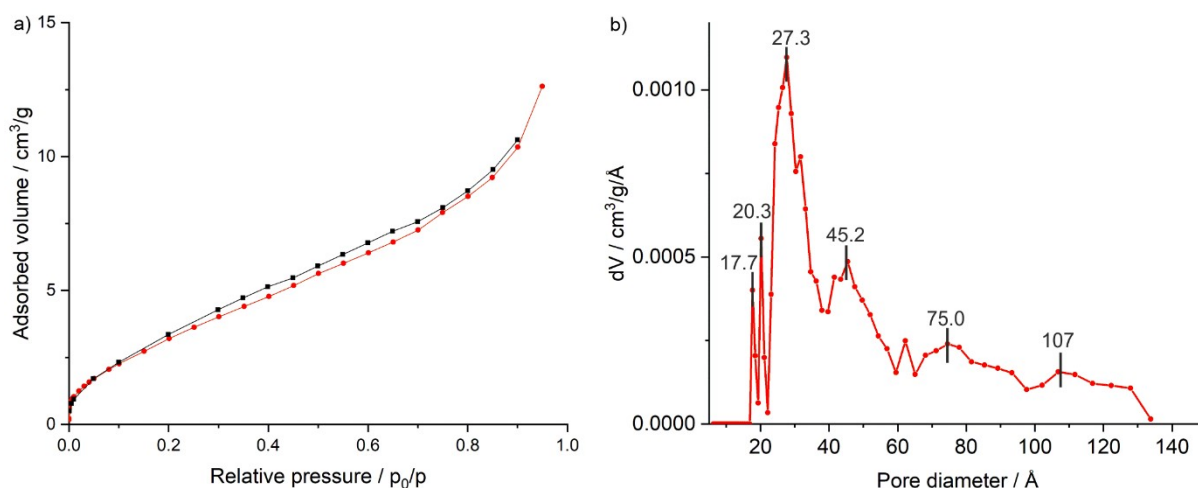

**Figure S1.** Sorption data of the  $\text{Ce}_2(\text{C}_2\text{O}_4)_3 \cdot 10 \text{H}_2\text{O}$  precursor particles: a) adsorption isotherm (red) and desorption isotherm (black) with nitrogen as the sorbent, b) evaluation of sorption data via DFT-based calculations to obtain pore volume and pore diameter.

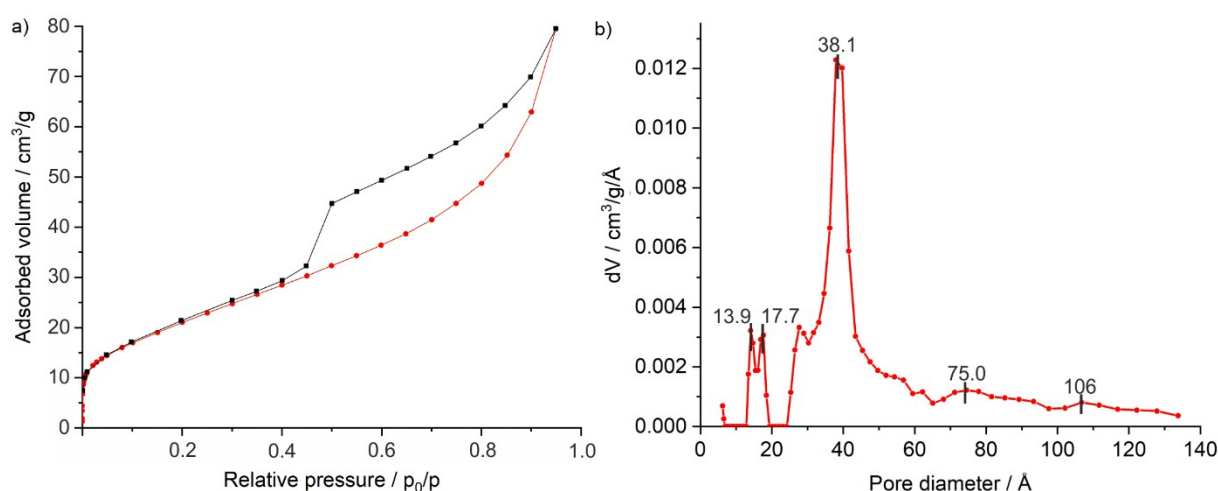

**Figure S2.** Sorption data of the  $\text{CeO}_2$  nanosponges: a) adsorption isotherm (red) and desorption isotherm (black) with nitrogen as the sorbent, b) evaluation of sorption data via DFT-based calculations to obtain pore volume and pore diameter.

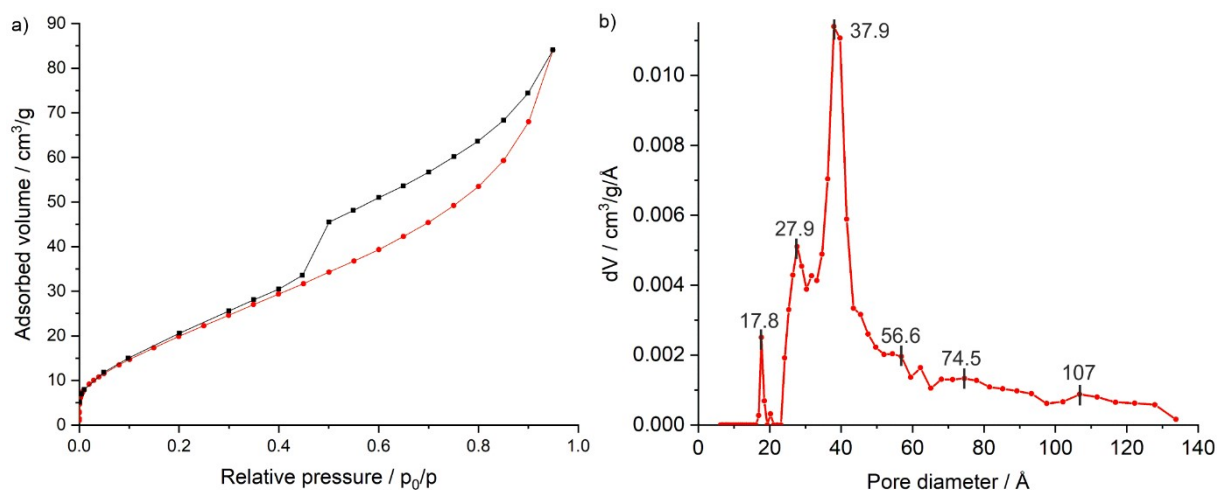

**Figure S3.** Sorption data of the Pt-CeO<sub>2</sub> nanosponges: a) adsorption isotherm (red) and desorption isotherm (black) with nitrogen as the sorbent, b) evaluation of sorption data via DFT-based calculations to obtain pore volume and pore diameter.

According to electron diffraction, the CeO<sub>2</sub> nanosponges are highly crystalline (Figure S4), which confirms the results from X-ray powder diffraction (*see main paper: Figure 3d*). The diffraction pattern was indexed to the CaF<sub>2</sub> structure of ceria.

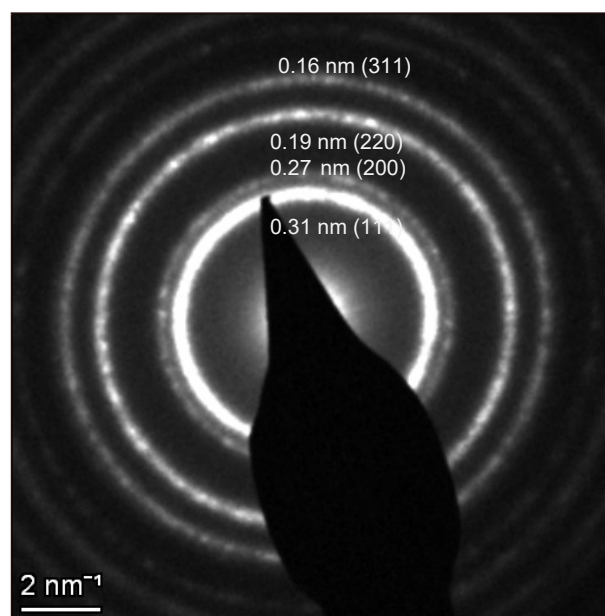

**Figure S4.** Diffraction pattern (*inset in main paper: Figure 4c*) with marked lattice spacing and crystal planes.

The porosity of the CeO<sub>2</sub> nanosponges is evidenced by electron microscopy and tomography (*see main paper: Figure 4*). Volume rendering and reconstruction of Z-slices of the CeO<sub>2</sub> nanosponges are also illustrated in Figure S5 and the Videos S1-S4.

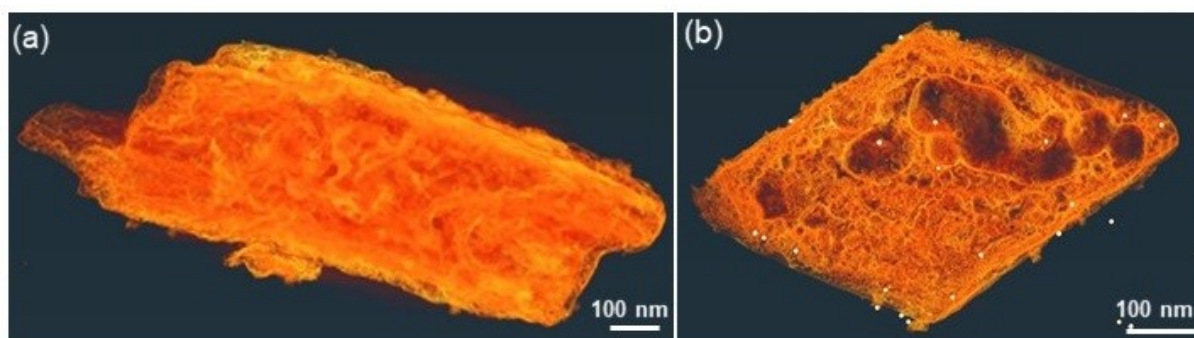

**Figure S5.** Volume rendering and reconstruction of Z-slices of the CeO<sub>2</sub> nanosponges: a) and b) show volume rendering based on electron tomography of the CeO<sub>2</sub> nanosponges (*see main paper: Figure 4d,f*). For volume rendering and reconstruction of Z-slices also see the Videos S1-S4).

The size distribution of the Pt nanoparticles on the Pt-CeO<sub>2</sub> nanosponges was deduced from > 200 Pt nanoparticles on HAADF-STEM images to a mean value of  $1.8 \pm 0.4$  nm (Figure S6).

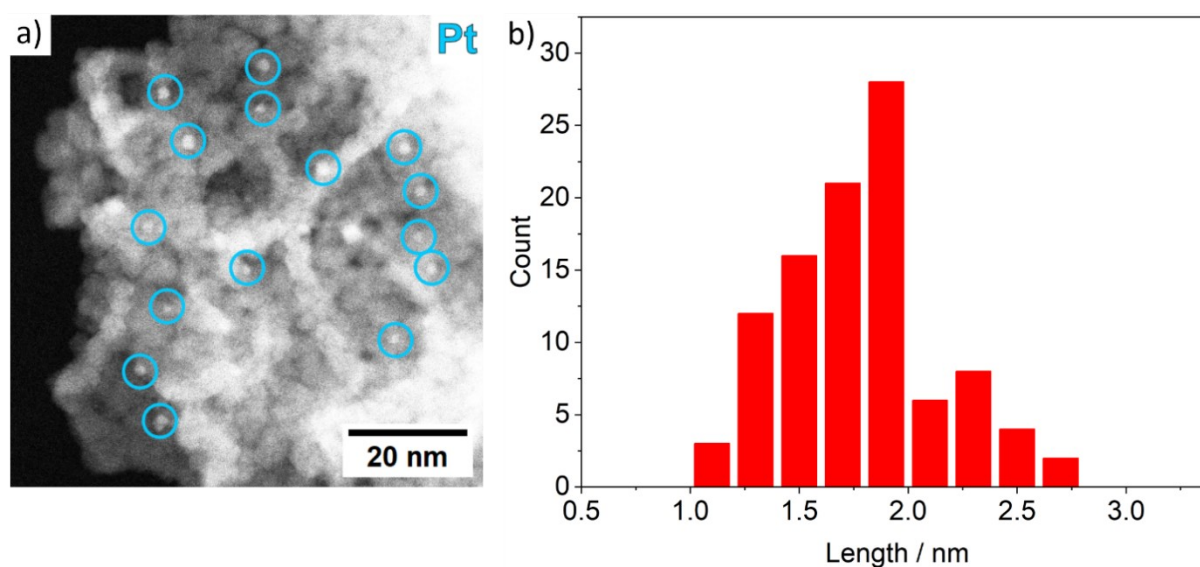

**Figure S6.** Size distribution of the Pt nanoparticles on Pt-CeO<sub>2</sub> nanosponges: a) HAADF-STEM image (with some single Pt nanoparticles marked with blue circles), b) size distribution of the Pt nanoparticles.

The thermal stability of the Pt-CeO<sub>2</sub> nanosponges was examined by sorption analysis and TEM up to a temperature of 400 °C (*see main paper: Figure 6*). Moreover, XRD shows Bragg reflections that are still broad and similar to the as-prepared CeO<sub>2</sub> nanosponges (Figure S7).

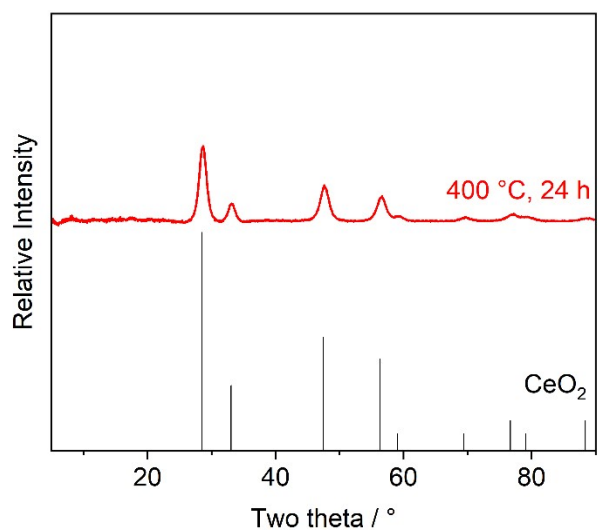

**Figure S7.** XRD of Pt-CeO<sub>2</sub> nanosponges after heating to 400 °C for 24 hours (CeO<sub>2</sub> as a reference, ICDD-No. C01-075-7101).

### References

- S1 A. Galarneau, F. Villemot, J. Rodriguez, F. Fajula and B. Coasne, *Langmuir*, **2014**, *30*, 13266-13274.
