# Supplementary material for: High-porosity Pt–CeO2 nanosponges as oxidation catalyst
Source: Royal Society of Chemistry journal article supplement (doi:10.1039/d4na00525b), 2024-12-30
Supplement: d4na00525b2.pdf [file d4na00525b2.pdf]

# Videos S1+S2 (associated with Figure 4d,e)

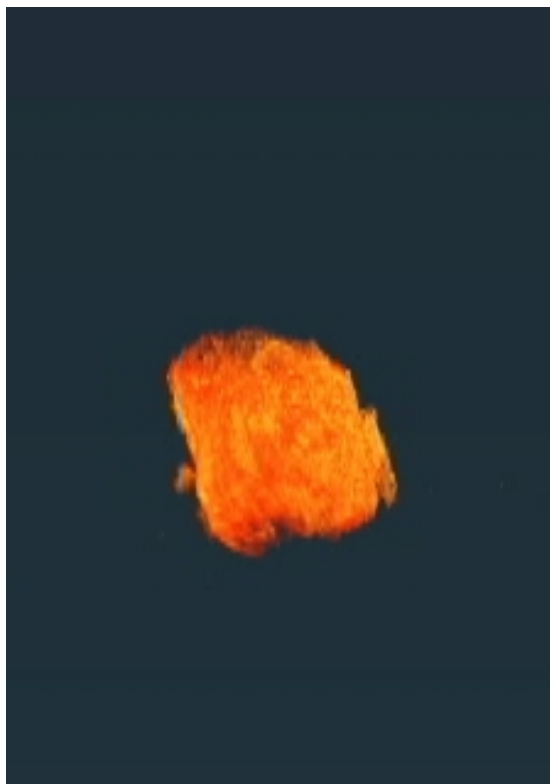

Volume rendering video

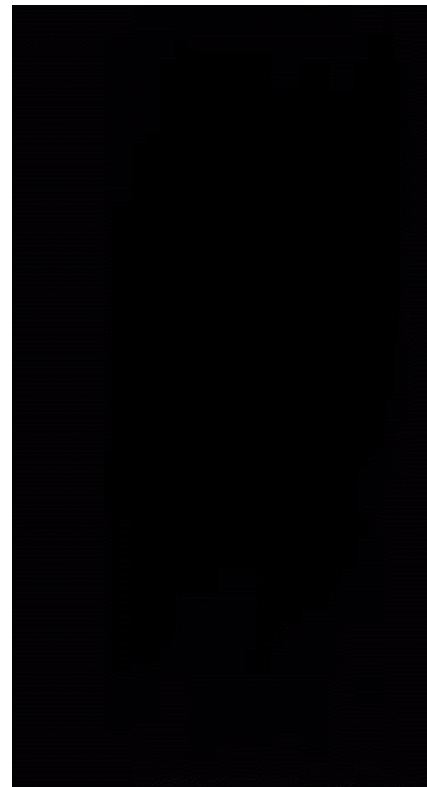

Reconstruction: Z slices video
